# Supplementary material
Source: PubMed Central journal article supplement (PMC3822527)
Supplement: NIHMS498374-supplement-Supplemental.pdf [file NIHMS498374-supplement-Supplemental.pdf]

Supplemental Table 2.

*Callous-Unemotional Traits and Facets of Aggression as Predictors of Outcome Expectations and Outcome Values Following Hypothetical Acts of Aggression*

| Outcomes                        | <u>Predictors</u> |           |         |                            |           |                   |                                |           |                  |
|---------------------------------|-------------------|-----------|---------|----------------------------|-----------|-------------------|--------------------------------|-----------|------------------|
|                                 | <u>CU Traits</u>  |           |         | <u>Physical Aggression</u> |           |                   | <u>Non-Physical Aggression</u> |           |                  |
|                                 | <i>b</i>          | <i>SE</i> | $\beta$ | <i>b</i>                   | <i>SE</i> | $\beta$           | <i>b</i>                       | <i>SE</i> | $\beta$          |
| <i>Outcome Expectations</i>     |                   |           |         |                            |           |                   |                                |           |                  |
| Tangible Rewards                | .02               | .14       | .02     | .28                        | .46       | .08               | -.02                           | .05       | -.05             |
| Reduction of Aversive Tx        | -.06              | .13       | -.06    | .36                        | .44       | .11               | .08                            | .04       | .22 <sup>†</sup> |
| Punishment                      | -.19              | .19       | -.14    | -.13                       | .65       | -.03              | .07                            | .07       | .13              |
| Victim Suffering                | -.68              | .20       | -.44**  | 1.35                       | .67       | .25*              | .05                            | .07       | .09              |
| Remorse                         | -.69              | .27       | -.33*   | .35                        | .90       | .05               | -.02                           | .09       | -.03             |
| Dominance/Control               | .59               | .28       | .28*    | -.65                       | .96       | -.09              | -.20                           | .10       | -.26*            |
| <i>Outcome Values</i>           |                   |           |         |                            |           |                   |                                |           |                  |
| Tangible Rewards                | .08               | .16       | .07     | .37                        | .54       | .09               | -.05                           | .05       | -.11             |
| Reduction of Aversive Tx        | -.05              | .15       | -.04    | -.32                       | .51       | -.08              | .01                            | .05       | .01              |
| Punishment                      | -.49              | .24       | -.27*   | -.24                       | .82       | -.04              | .11                            | .08       | .16              |
| Victim Suffering                | -.76              | .33       | -.31*   | .57                        | 1.11      | .07               | .10                            | .11       | .11              |
| Remorse                         | -.70              | .28       | -.33*   | .38                        | .96       | .05               | .09                            | .10       | .11              |
| Dominance/Control               | .19               | .30       | .08     | 1.54                       | 1.03      | .18               | -.25                           | .10       | -.29*            |
| <i>Overall Empathy Measures</i> |                   |           |         |                            |           |                   |                                |           |                  |
| Empathetic Sadness              | -.72              | .21       | -.44**  | -.52                       | .70       | -.09              | .04                            | .07       | .06              |
| Empathic Concern                | -.58              | .26       | -.28*   | -1.73                      | .89       | -.24 <sup>†</sup> | .22                            | .09       | .29*             |
| Perspective-Taking              | -.28              | .20       | -.19    | -.78                       | .66       | -.15              | .15                            | .07       | .28*             |

<sup>†</sup> $p < .08$ , \* $p < .05$ , \*\* $p < .001$

Supplemental Table 2.

*Correlations Between Narcissism and Primary Study Outcomes*

---

|                                 | APSD       |
|---------------------------------|------------|
|                                 | Narcissism |
| <hr/>                           |            |
| <i>Outcome Expectations</i>     |            |
| Tangible Rewards                | .06        |
| Reduction of Aversive Tx        | .27*       |
| Punishment                      | -.08       |
| Victim Suffering                | -.18       |
| Remorse                         | -.11       |
| Dominance/Control               | .00        |
| <i>Outcome Values</i>           |            |
| Tangible Rewards                | .09        |
| Reduction of Aversive Tx        | .09        |
| Punishment                      | -.14       |
| Victim Suffering                | -.14       |
| Remorse                         | -.11       |
| Dominance/Control               | .06        |
| <i>Overall Empathy Measures</i> |            |
| Empathetic Sadness              | -.09       |
| Empathic Concern                | -.06       |
| Perspective-Taking              | .08        |

---

\* $p < .05$
